# Supplementary material for: Functional determinants of the quorum-sensing non-coding RNAs and their roles in target regulation
Source: PubMed Central journal article supplement — EMBO J. 2013 Jul 9;32(15):2158–71. doi: 10.1038/emboj.2013.155 (PMC3730234; doi:10.1038/emboj.2013.155), 2013-07-09

## Supplemental Information

### Functional determinants of the quorum-sensing non-coding RNAs and their roles in target regulation

Yi Shao<sup>1\*</sup>, Lihui Feng<sup>1\*</sup>, Steven T. Rutherford<sup>1</sup>, Kai Papenfort<sup>1</sup>, Bonnie L. Bassler<sup>1, 2\*\*</sup>

<sup>1</sup>Department of Molecular Biology, Princeton University, Princeton, NJ, USA

<sup>2</sup>Howard Hughes Medical Institute, Chevy Chase, MD, USA

#### **This supplement contains:**

Figures S1 to S9

Tables S1 to S4

Supplemental References

**Figure S1** Gene expression changes in *qrr1-5*, *aphA*, and *luxR* following induction of each *qrr* gene. *Qrr1-4* sRNA, *aphA* mRNA, and *luxR* mRNA following a pulse of induction of each *qrr* gene was measured by qRT-PCR. White: without arabinose, Black: with 0.2% arabinose. *Qrr5* sRNA was measured by northern blot because qRT-PCR priming was unsuccessful for *Qrr5*. *Qrr2* is shown as a control for the northern analysis. 5S rRNA was used as the loading control.

**Figure S2** Schematic of plasmid-borne translational *gfp* fusions. Horizontal lines denote 5' UTRs; black bars indicate the target mRNA coding sequences present in the fusions; gray bars indicate the *gfp* coding sequence.

**Figure S3** Predicted base-pairing between *Qrr4* and its direct targets. The first forty-eight nucleotides of *Qrr4* are shown from 5' to 3'. Sequences of the mRNA targets are shown from 3' to 5'. Nucleotides predicted to be involved in base-pairing are shown in red. Translational start sites are denoted as +1.

**Figure S4** Regulation of mRNA targets by *Qrr1-5*. qRT-PCR was performed following induction of each *qrr* gene. White: without arabinose, Black: with 0.2% arabinose.

**Figure S5** *Qrr4* represses *vibhar\_00505* through base-pairing. Fluorescence from *E. coli* carrying a plasmid with an IPTG inducible translational GFP fusion to *vibhar\_00505* (pLF804) was measured in the presence of an empty vector (pLF253), a vector with wild-type *Qrr4* (pLF127), a vector with *Qrr4mut1* (pYS258), or a vector with *Qrr4mut4* (pYS221). Mutations are highlighted by overlines. Means and SEMs of triplicate samples are shown. Base-pairing between *vibhar\_00505* and *Qrr4* was predicted by RNAhybrid (<http://bibiserv.techfak.uni-bielefeld.de/rnahybrid/>). Nucleotides involved in base-pairing are shown in red. The translational start site is denoted as +1.

**Figure S6** Regulation of sixteen *Qrr* sRNA targets by *Qrr1*, *Qrr4*, and *Qrr4* mutants. Fluorescence from plasmid-encoded *V. harveyi* target-GFP translational fusions was measured in *E. coli*

carrying an empty vector (pLF253), a vector expressing a tetracycline inducible *qrr1* (pLF396), *qrr4* (pLF127), *qrr4* stem-loop 1 deletion ( $\Delta$ SL1, pYS225), *qrr4* stem-loop 2 deletion ( $\Delta$ SL2, pYS226), *qrr4* stem-loop 3 deletion ( $\Delta$ SL3, pYS227), *qrr4* stem-loop 1 and stem-loop 3 double deletion ( $\Delta$ SL1&3, pYS229), *qrr4* stem-loop 1 inversion (SL1\*, pYS230), *qrr4* stem-loop 2 inversion (SL2\*, pYS231), or *qrr4* stem-loop 3 inversion (SL3\*, pYS232). GFP from three independent cultures was measured for each strain. Means and SEMs are shown, with all measurements normalized to the mean of the vector controls.

**Figure S7** Regulatory functions of Qrr4 chimeras. Fluorescence from plasmid-encoded *V. harveyi* AphA-GFP (pLF255) and LuxR-GFP (pLF128) translational fusions was measured in *E. coli* carrying an empty vector (pLF253), a vector expressing tetracycline inducible *qrr4* (pLF127), WT chimeric *qrr4* (WT-MicA/WT-OmrB, pYS281/pYS282), stem-loop 1 deletion chimeric *qrr4* ( $\Delta$ SL1-MicA/ $\Delta$ SL1-OmrB, pYS278/pYS279), stem-loop 2 deletion chimeric *qrr4* ( $\Delta$ SL2-MicA/ $\Delta$ SL2-OmrB, pYS275/pYS276), stem-loop 3 deletion chimeric *qrr4* ( $\Delta$ SL3-MicA/ $\Delta$ SL3-OmrB, pYS272/pYS273), or the double stem-loop 1 and stem-loop 3 double deletion chimeric *qrr4* ( $\Delta$ SL1&3-MicA/ $\Delta$ SL1&3-MicA, pYS269/pYS270). GFP from three independent cultures was measured for each strain and the means and SEMs are shown. All measurements were normalized to the mean of the vector controls.

**Figure S8** SL1 confers stability to Qrr1. Half-lives of plasmid-encoded *V. harveyi* WT Qrr1 (pLF396), the SL1 disrupted Qrr1 mutant (Qrr1 SL1D, pYS299), and the SL1 restored Qrr1 mutant (Qrr1 SL1R, pYS300) were measured in *E. coli* by northern blot. Northern blots are shown with the data plotted. 5S rRNA was used as the control.

**Figure S9** Control autoinducer responses of Qrr target mRNAs in the absence of Qrr sRNAs. *V. harveyi*  $\Delta$ *luxM*  $\Delta$ *luxPQ*  $\Delta$ *cqsS*  $\Delta$ *qrr1-5* strain (LF1451) was grown in 1  $\mu$ M AI-1 to mid-logarithmic phase. 100  $\mu$ M 3-oxo-C12-HSL (black) or DMSO (white) was added to the culture for 15 minutes and the mRNA levels of the target genes were measured by qRT-PCR.

**Table S1. Genes regulated by Qrr sRNA induction identified by microarray analysis.**

|                                                      |                                                                   | Qrr1  | Qrr2  | Qrr3   | Qrr4 <sup>a</sup> | Qrr4 <sup>b</sup> | Qrr5  |
|------------------------------------------------------|-------------------------------------------------------------------|-------|-------|--------|-------------------|-------------------|-------|
| <b>Known Qrr sRNA target genes</b>                   |                                                                   |       |       |        |                   |                   |       |
| VIBHAR_00046                                         | AphA                                                              |       | 5.46  | 7.41   | 7.36              | 5.74              | 10.93 |
| VIBHAR_02765                                         | LuxM                                                              | -3.41 | -3.94 | -2.77  | -3.39             | -3.81             | -3.41 |
| VIBHAR_02766                                         | LuxN                                                              |       |       |        |                   | -2.17             |       |
| VIBHAR_03459                                         | LuxR                                                              | -7.89 | -6.50 | -10.27 | -8.28             | -9.25             | -7.89 |
| VIBHAR_03460                                         | hypothetical protein                                              |       |       |        | -2.43             | -2.55             | -2.46 |
| <b>Novel Qrr sRNA target genes</b>                   |                                                                   |       |       |        |                   |                   |       |
| VIBHAR_00417                                         | prephrenate dehydratase                                           |       | -2.36 |        | -2.57             | -2.41             |       |
| VIBHAR_00504                                         | RNA polymerase ECF-type sigma factor                              |       | -2.77 |        | -2.27             | -3.43             | -2.17 |
| VIBHAR_00505                                         | chromosome segregation ATPase                                     |       |       | -2.58  | -2.27             | -3.32             | -2.28 |
| VIBHAR_02446                                         | hypothetical protein                                              |       |       | 2.27   | 2.35              |                   |       |
| VIBHAR_02474                                         | virulence factor, aerolysin / hemolysin / leukocidin toxin        |       |       |        |                   |                   | -2.51 |
| VIBHAR_02509                                         | hemagglutinin/protease                                            |       |       |        | -3.10             | -3.61             | -3.63 |
| VIBHAR_03626                                         | deacetylase DA1                                                   | -4.76 | -4.63 | -5.58  | -4.44             | -4.11             | -4.76 |
| VIBHAR_04936                                         | glutathione-dependent formaldehyde-activating like protein        |       |       |        | -2.69             |                   |       |
| VIBHAR_05020                                         | hypothetical protein                                              |       | -3.05 | -3.71  | -2.97             | -4.82             |       |
| VIBHAR_05691                                         | histidine kinase                                                  |       | -4.50 | -4.50  | -5.98             | -5.28             | -3.73 |
| VIBHAR_05763                                         | hypothetical protein                                              |       | -2.30 | -2.53  | -3.46             | -3.32             | -2.93 |
| VIBHAR_06448                                         | hemolysin A                                                       |       | -2.41 |        |                   |                   |       |
| VIBHAR_06453                                         | putative toxin transport protein                                  |       |       |        |                   | -2.31             |       |
| VIBHAR_06665                                         | polysaccharide export outer membrane protein                      |       |       | -2.19  |                   |                   |       |
| VIBHAR_06666                                         | phosphatase                                                       |       | -2.23 |        |                   |                   |       |
| VIBHAR_06667                                         | tyrosine-protein kinase                                           |       |       | -2.28  |                   | -2.58             |       |
| VIBHAR_06888                                         | hypothetical protein                                              | -4.23 | -4.26 | -4.03  | -3.86             | -4.26             | -4.23 |
| VIBHAR_06930                                         | hypothetical protein                                              |       | 3.03  | 2.41   | 2.81              | 4.23              | 2.46  |
| VIBHAR_06931                                         | GGDEF family protein                                              |       | 2.41  |        | 2.39              | 3.16              |       |
| VIBHAR_p08221                                        | hypothetical protein                                              |       |       | -2.20  |                   |                   |       |
| VIBHAR_p08222                                        | isoprenoid biosynthesis protein with amidotransferase-like domain |       | -2.58 | -2.43  | -2.62             | -3.18             |       |
| VIBHAR_p08223                                        | hypothetical protein                                              |       | -2.83 | -2.53  | -2.77             | -3.27             |       |
| <b>Arabinose-induced genes</b>                       |                                                                   |       |       |        |                   |                   |       |
| VIBHAR_03326                                         | aldose 1-epimerase                                                | 4.17  | 4.00  | 5.24   | 4.06              | 4.14              | 4.17  |
| VIBHAR_03327                                         | galactokinase                                                     | 3.41  | 3.68  | 3.78   | 4.03              | 4.06              | 3.41  |
| VIBHAR_03329                                         | galactose-1-phosphate uridylyltransferase                         | 4.53  | 4.08  | 4.32   | 3.94              | 3.89              | 4.53  |
| VIBHAR_03331                                         | UDP-glucose 4-epimerase                                           | 13.18 | 19.03 | 21.26  | 17.15             | 14.22             | 13.18 |
| VIBHAR_03332                                         | hypothetical protein                                              | 6.54  | 4.11  | 6.54   |                   |                   |       |
| <b>False positive/Qrr sRNA indirect target genes</b> |                                                                   |       |       |        |                   |                   |       |
| VIBHAR_00986                                         | hypothetical protein                                              |       |       |        | -3.01             |                   |       |
| VIBHAR_05213                                         | maltose/maltodextrin transporter ATP-binding protein              |       |       |        | -2.28             |                   |       |
| VIBHAR_05384                                         | peptidase T                                                       |       |       |        | -2.85             |                   |       |
| VIBHAR_06097                                         | hypothetical protein                                              |       |       |        | -2.68             |                   |       |
| VIBHAR_06299                                         | hypothetical protein                                              |       |       |        |                   |                   | 3.05  |
| VIBHAR_06895                                         | predicted glycosyl hydrolase                                      | 4.44  | 6.96  |        |                   | 3.68              | 4.44  |

Genes that changed expression two-fold or more in all four array replicates are listed and means are shown. Fold-change in gene expression is represented as the value from the Qrr sRNA induction strains divided by the value from the Qrr sRNA non-induction strains (OD<sub>600</sub> ~ 0.5: Qrr1, Qrr2, Qrr3, Qrr4<sup>a</sup>, Qrr5; OD<sub>600</sub> ~ 1.0: Qrr4<sup>b</sup>). +, activation; -, repression.

**Table S2. Strains used in this study.**

| Strain                   | Relevant Genotype                                    | Source                         |
|--------------------------|------------------------------------------------------|--------------------------------|
| <b><i>E. coli</i></b>    |                                                      |                                |
| S17 $\lambda$ pir        | wild type                                            | (De Lorenzo & Timmis 1994)     |
| BW-RI                    | wild type                                            | (Levine et al. 2007)           |
| LF1018                   | BW-RI <i>rne-50 zce-726::Tn10</i>                    | this study (Massé et al. 2003) |
| <b><i>V. harveyi</i></b> |                                                      |                                |
| BB120                    | wild type                                            | (Bassler et al. 1997)          |
| TL25                     | $\Delta luxM \Delta luxPQ \Delta cqsS$               | (Long et al. 2009)             |
| LF1451                   | $\Delta luxM \Delta luxPQ \Delta cqsS \Delta qrr1-5$ | this study                     |

**Table S3. Plasmids Used in this Study.**

| Plasmid             | Description                       | Source               |
|---------------------|-----------------------------------|----------------------|
| pEVS143             | vector                            | (Dunn et al. 2006)   |
| pZA31- <i>lucNB</i> | vector                            | (Levine et al. 2007) |
| pZE12G              | vector                            | (Levine et al. 2007) |
| pLF1097             | pEVS143-Vh Qrr1                   | this study           |
| pLF875              | pEVS143-Vh Qrr2                   | this study           |
| pLF898              | pEVS143-Vh Qrr3                   | this study           |
| pLF575              | pEVS143-Vh Qrr4                   | this study           |
| pLF878              | pEVS143-Vh Qrr5                   | this study           |
| pLF253              | pZA31 empty vector                | this study           |
| pLF396              | pZA31-Vh Qrr1                     | this study           |
| pYS241              | pZA31-Vh Qrr1 <sup>9+</sup>       | this study           |
| pYS299              | pZA31-Vh Qrr1 SL1D                | this study           |
| pYS300              | pZA31-Vh Qrr1 SL1R                | this study           |
| pLF186              | pZA31-Vh Qrr2                     | this study           |
| pLF126              | pZA31-Vh Qrr3                     | this study           |
| pLF127              | pZA31-Vh Qrr4                     | this study           |
| pYS258              | pZA31-Vh Qrr4 mut1                | this study           |
| pYS259              | pZA31-Vh Qrr4 mut2                | this study           |
| pLF770              | pZA31-Vh Qrr4 mut3                | this study           |
| pYS221              | pZA31-Vh Qrr4 mut4                | this study           |
| pYS239              | pZA31-Vh Qrr4 <sup>9-</sup>       | this study           |
| pYS287              | pZA31-Vh Qrr4 SL1D                | this study           |
| pYS296              | pZA31-Vh Qrr4 SL1R                | this study           |
| pYS225              | pZA31-Vh Qrr4 $\Delta$ SL1        | this study           |
| pYS226              | pZA31-Vh Qrr4 $\Delta$ SL2        | this study           |
| pYS227              | pZA31-Vh Qrr4 $\Delta$ SL3        | this study           |
| pYS229              | pZA31-Vh Qrr4 $\Delta$ SL1&3      | this study           |
| pYS230              | pZA31-Vh Qrr4 SL1*                | this study           |
| pYS231              | pZA31-Vh Qrr4 SL2*                | this study           |
| pYS232              | pZA31-Vh Qrr4 SL3*                | this study           |
| pYS280              | pZA31-Vh Qrr4 WT-RybB             | this study           |
| pYS281              | pZA31-Vh Qrr4 WT-MicA             | this study           |
| pYS282              | pZA31-Vh Qrr4 WT-OmrB             | this study           |
| pYS277              | pZA31-Vh Qrr4 $\Delta$ SL1-RybB   | this study           |
| pYS278              | pZA31-Vh Qrr4 $\Delta$ SL1-MicA   | this study           |
| pYS279              | pZA31-Vh Qrr4 $\Delta$ SL1-OmrB   | this study           |
| pYS274              | pZA31-Vh Qrr4 $\Delta$ SL2-RybB   | this study           |
| pYS275              | pZA31-Vh Qrr4 $\Delta$ SL2-MicA   | this study           |
| pYS276              | pZA31-Vh Qrr4 $\Delta$ SL2-OmrB   | this study           |
| pYS271              | pZA31-Vh Qrr4 $\Delta$ SL3-RybB   | this study           |
| pYS272              | pZA31-Vh Qrr4 $\Delta$ SL3-MicA   | this study           |
| pYS273              | pZA31-Vh Qrr4 $\Delta$ SL3-OmrB   | this study           |
| pYS268              | pZA31-Vh Qrr4 $\Delta$ SL1&3-RybB | this study           |

|         |                                    |            |
|---------|------------------------------------|------------|
| pYS269  | pZA31-Vh Qrr4 ΔSL1&3-MicA          | this study |
| pYS270  | pZA31-Vh Qrr4 ΔSL1&3-OmrB          | this study |
| pLF187  | pZA31-Vh Qrr5                      | this study |
| pLF255  | pZE12G-AphA-GFP                    | this study |
| pLF128  | pZE12G-LuxR-GFP                    | this study |
| pYS212  | pZE12G-VIBHAR_00417-GFP            | this study |
| pLF804  | pZE12G-VIBHAR_00505-GFP            | this study |
| pLF1092 | pZE12G-VIBHAR_00986-GFP            | this study |
| pLF1093 | pZE12G-VIBHAR_02446-GFP            | this study |
| pLF1382 | pZE12G-VIBHAR_02474-GFP            | this study |
| pYS214  | pZE12G-VIBHAR_02509-GFP            | this study |
| pLF1228 | pZE12G-VIBHAR_03626-GFP            | this study |
| pYS216  | pZE12G-VIBHAR_04936-GFP            | this study |
| pLF1222 | pZE12G-VIBHAR_05020-GFP            | this study |
| pLF1103 | pZE12G-VIBHAR_05213-GFP            | this study |
| pLF1231 | pZE12G-VIBHAR_05384-GFP            | this study |
| pLF767  | pZE12G-VIBHAR_05691-GFP            | this study |
| pYS256  | pZE12G-VIBHAR_05691-GFP mutI       | this study |
| pYS257  | pZE12G-VIBHAR_05691-GFP mutII      | this study |
| pYS218  | pZE12G-VIBHAR_05763-GFP            | this study |
| pLF1090 | pZE12G-VIBHAR_06097-gfp            | this study |
| pLF1727 | pZE12G-VIBHAR_06299-gfp            | this study |
| pLF1373 | pZE12G-VIBHAR_06448-GFP            | this study |
| pLF1237 | pZE12G-VIBHAR_06455-GFP            | this study |
| pLF806  | pZE12G-VIBHAR_06665-GFP            | this study |
| pLF1235 | pZE12G-VIBHAR_06888-GFP            | this study |
| pLF1285 | pZE12G-VIBHAR_06930-GFP            | this study |
| pLF840  | pZE12G-VIBHAR_06930-GFP mutI       | this study |
| pLF1730 | pZE12G-VIBHAR_06930-GFP truncation | this study |
| pLF1225 | pZE12G-VIBHAR_p08223-GFP           | this study |

**Table S4. Primers used in this study.**

| Primer | Sequence                                                      | Use        |
|--------|---------------------------------------------------------------|------------|
| YS701  | GAAGTTGCATTAATAGTTAATAATTAAGGGGAATATC                         | pYS212     |
| YS702  | ATAGGTACACACATTCCCTAGCGCAAGCAACG                              | pYS212     |
| YS704  | GCATTTTTGCTACGAATATACACACATAAG                                | pYS214     |
| YS705  | ATAGGTACCGACCAGCGATAATAAAGTGACGTTTC                           | pYS214     |
| YS707  | ATTCCAATAAGAGAAGGACTAAAAATGGAAG                               | pYS216     |
| YS708  | ATAGGTACCGCGCATTTCAGAGCAATGACAATT                             | pYS216     |
| LF615  | GCTAGGTTTTATATGTCAAGGAT                                       | pYS218     |
| LF616  | AATAGGTACCGTTTTTGATTAGCTCTTCGAGGTAG                           | pYS218     |
| YS715  | ACCCTTATTAAGCCGAGGGTACCTTCGGAAGTACGTTGTTAGTGAATACACA          | pYS221     |
| YS716  | TGTGTATTCATAACAACGTCAGTTCGGAAGGTGACCCCTCGGCTTAATAAGGGT        | pYS221     |
| YS723  | CAGTGATAGAGATACTGAGCACACCTAGCCAAGTACGTTGTTA                   | pYS225     |
| YS724  | TAACAACGTCAGTTGGCTAGGTGTGCTCAGTATCTCTATCACTG                  | pYS225     |
| YS725  | GACCCCTTATAAGCCGAGGGTTCGTAATACACATTGTTACAAG                   | pYS226     |
| YS726  | CTTGTGAACAATGTGTATTACGACCCTCGGCTTAATAAGGGTTC                  | pYS226     |
| YS727  | ACCTAGCCAAGTACGTTGTTAAAGTATATACCGCCAATCAACT                   | pYS227/229 |
| YS728  | AGTTGATTGGCGGTATATACTTTAACAACGTCAGTTGGCTAGGT                  | pYS227/229 |
| YS731  | GATAGAGATACTGAGCACACTGGGAGATTAAGCCTCCAGACCTAGCCAAGTACGTT      | pYS230     |
| YS732  | AACGTCAGTTGGCTAGGTCTGGGAAGGCTTAATCTCCAGTGTGCTCAGTATCTCTATC    | pYS230     |
| YS733  | CCTTATTAAGCCGAGGGTCAATTGTTGCAGTCAACCGATCCAGTGAATACACATTGTTTAC | pYS231     |
| YS734  | GTGAACAATGTGTATTCACTGGATCGGTTGACTGCAACAATGACCCCTCGGCTTAATAAGG | pYS231     |
| YS735  | CTAGCCAAGTACGTTGTTACACTTGTACATATAAGTGAAGTATATACCGCCAATCAA     | pYS232     |
| YS736  | TTGATTGGCGGTATATACTTCACTTATATGTGACAAGTGAACAACGTCAGTTGGCTAG    | pYS232     |
| YS783  | TAGAGATACTGAGCACAGACCCTTAGGGTACCTAGCCAAGTACGTTGT              | pYS239     |

|       |                                                             |                           |
|-------|-------------------------------------------------------------|---------------------------|
| YS784 | ACAACGTCAGTTGGCTAGGTGACCCTAAGGGTCTGTGCTCAGTATCTCTA          | pYS239                    |
| YS787 | TAGAGATACTGAGCACGGACCCCTCTTAAGCCGAGGGTCACCTAGCCAAGTACGTTGT  | pYS241                    |
| YS788 | ACAACGTCAGTTGGCTAGGTGACCCTCGGCTTAAGAGGGGTCCGTGCTCAGTATCTCTA | pYS241                    |
| YS821 | GTTGGAAAACACAATAAAAAATCCGATAATTATGAACTTAGTAAC               | pYS256                    |
| YS822 | GTTACTAAGTTTTCATAATTATCGGATTTTTATTGTGTTTTCCAAC              | pYS256                    |
| YS823 | AACAAGATACTGAGCACTCCTCAACGAAAACACAATAAAAAATGGC              | pYS257                    |
| YS824 | GCCATTTTTATTGTGTTTTCGTTGAGGAGTGCTCAGTATCTTGT                | pYS257                    |
| YS825 | CTGAGCACAGACCCTTATTATCGGGAGGGTCACCTAGCCAAGT                 | pYS258                    |
| YS826 | CAGTTGGCTAGGTGACCCTCCCGATAATAAGGGTCTGTGCTCAG                | pYS258                    |
| YS651 | TAAGCCGAGGGTCACCTAGCGTTGAGACGTTGTTAGTGAATACAC               | pYS259                    |
| YS652 | GTGTATTCATAACAACGCTCAACGCTAGGTGACCCTCGGCTTA                 | pYS259                    |
| YS757 | ATAGGATCCATCAAATAAAACGAAAGGCTC                              | pYS268~282                |
| YS933 | GATGGATCCGAGAGGGTTGCAGGGTAGTAG                              | pYS268/271/274/277/280    |
| YS934 | GATGTCCCCATTTTGTGGAGCC                                      | pYS268/271/274/277/280    |
| YS936 | GATGGATCCGCGGTGTGGCTGGAAAAACAC                              | pYS269/272/275/278/281    |
| YS937 | CATCCCTGAATTCAGAGATGAAATTTTGG                               | pYS269/272/275/278/281    |
| YS939 | GATGGATCCGTCGGTTACTGTTACAGATTGATGAC                         | pYS270/273/276/279/282    |
| YS940 | AGGTGAAGTCAACTTCGGGTTGAG                                    | pYS270/273/276/279/282    |
| YS941 | TAACAACGTCAGTTGGCTAGGTGTG                                   | pYS268/269/270            |
| YS942 | TAACAACGTCAGTTGGCTAGGTGAC                                   | pYS271/272/273            |
| YS943 | GTGAACAATGTGTATTCACGACCCTC                                  | pYS274/275/276            |
| YS944 | GTGAACAATGTGTATTCATAACAACGTC                                | pYS277/278/279            |
| YS945 | GTGAACAATGTGTATTCATAACAACGTC                                | pYS280/281/282            |
| YS883 | GTGATAGAGATACTGAGCACAGAGGGTTATTAAGCCGAGGGTCACCTAG           | pYS287                    |
| YS884 | CTAGGTGACCCTCGGCTTAATAACCCTCTGTGCTCAGTATCTCTATCAC           | pYS287                    |
| YS956 | GAGCACAGAGGGTTATTAAGCCGACCCTCACCTAGCCAAGTACGTTGTTAG         | pYS296                    |
| YS957 | CTAACAACGTCAGTTGGCTAGGTGAGGGTCGGCTTAATAACCCTCTGTGCTC        | pYS296                    |
| YS946 | GTGATAGAGATACTGAGCACGGAGGGCTCGGGTCACCTAGCCAAGTAC            | pYS299                    |
| YS947 | GTCAGTTGGCTAGGTGACCCGAGCCCTCCGTGCTCAGTATCTCTATCAC           | pYS299                    |
| YS948 | GAGATACTGAGCACGGAGGGCTCCCCTCACCTAGCCAAGTACGTTGTT            | pYS300                    |
| YS949 | AACAACGTCAGTTGGCTAGGTGAGGGGAGCCCTCCGTGCTCAGTATCTC           | pYS300                    |
| LF145 | AATAGGATCCGTGCTCAGTATCTCTATCACTGATAGG                       | pLF253                    |
| LF54  | AATAGGATCCATCAAATAAAACGAAAGGCT                              | pLF253                    |
| LF53  | GTGCTCAGTATCTCTATCACTGATAGG                                 | pLF396/126/127            |
| LF54  | AATAGGATCCATCAAATAAAACGAAAGGCT                              | pLF396/126/127            |
| LF55  | GTGCTCAGTATCTTGTATCCGCTC                                    | pZE12G-target-GFP fusions |
| LF56  | AATAGGTACCATGTCTAAAGGTGAAGAACTT                             | pZE12G-target-GFP fusions |
| LF610 | AATAGGTACCTTATGTCTACGACCATAGCTCGGGC                         | pLF1097                   |
| LF611 | GGACCCCTCGGGTCACCTA                                         | pLF1097                   |
| LF98  | CGACCCCTTCTTAAGCCGAGG                                       | pLF875                    |
| LF607 | AATAGGTACCTGACAACGCTCTGAATCCTGCATCT                         | pLF875                    |
| LF57  | TGACCCTTCTTAAGCCGAGGG                                       | pLF898                    |
| LF608 | AATAGGTACCTTGGTTCAACAGGGAGTAAGGATTT                         | pLF898                    |
| LF303 | AATAGGTACCAGGATCCGGTGATTGATTGAGCAAG                         | pLF575                    |
| LF304 | AATAGCATGCAAAAAGACCCCTCATAAAT                               | pLF575                    |
| LF305 | AATAGCATGCATAATGTGCCTGTCAAATGG                              | pLF575                    |
| LF306 | TGACCCTCGGCTTAATAAGGGTCTGGAGAAACAGTAGAGAGTTGCG              | pLF575                    |
| LF307 | CGCAACTCTCTACTGTTTCTCCAGACCCTTATTAAGCCGAGGGTCA              | pLF575                    |
| LF308 | AATAGGTACCCGGTGAATCAGCGGATTCAGGTGAC                         | pLF575                    |
| LF94  | TGACCCTTTTAAGCCGAGGG                                        | pLF878                    |
| LF609 | AATAGGTACCCGGCATTATTCGACTGGAAACTGTA                         | pLF878                    |
| LF100 | GGACCCCTCGGGTCACCTAT                                        | pLF396                    |
| LF101 | AATAGGATCCCACATCTGCAGACAAAAAAGAAGCC                         | pLF396                    |
| LF648 | GGACCCCTCGGGTCACCTAGCCAAGTACGTTGTTAGTGA                     | pLF396                    |
| LF649 | TCACTAACAACGTCAGTTGGCTAGGTGACCCGAGGGGTCC                    | pLF396                    |
| LF98  | CGACCCCTTCTTAAGCCGAGG                                       | pLF186                    |
| LF99  | AATAGGATCCTACAAACAAAAAATAGCCAACCGC                          | pLF186                    |
| LF57  | TGACCCTTCTTAAGCCGAGGG                                       | pLF126                    |

|        |                                          |                      |
|--------|------------------------------------------|----------------------|
| LF58   | AATAGGATCCCCAGATAAAAAATAGCCAACCGCAA      | pLF126               |
| LF59   | AGACCCTTATTAAGCCGAGGGTC                  | pLF127               |
| LF60   | AATAGGATCCCTAGAAAGAAAAACGCCAATCACAA      | pLF127               |
| LF94   | TGACCCTTTTAAGCCGAGGG                     | pLF187               |
| LF95   | AATAGGATCCTGATTGTGAAAAAAGCCAACCCAC       | pLF187               |
| LF554  | GCCGAGGGTCACCTACGGAAGTACGTTGTTAG         | pLF770               |
| LF555  | CTAACACGTCAGTTCCGTAGGTGACCCTCGGC         | pLF770               |
| LF61   | TGCTTTAAGCAACTATTAATAATCAAT              | pLF128               |
| LF62   | AATAGGTACCAGTACGAGGTCTCTTTGCAAT          | pLF128               |
| LF142  | CCTGCTGGAAGCTCACAAAT                     | pLF255               |
| LF113  | AATAGGTACCTACAGTTAGAATTACGTGTGGTAATGAC   | pLF255               |
| LF562  | AATAGGTACCTAAAGCAGACAGCCAGATCG           | pLF804               |
| LF544  | CGAAGTCACGCGCCTTGCTTTTCAT                | pLF804               |
| LF637  | GAGCTTAAAAAATTACCTACCTAT                 | pLF1092              |
| LF639  | AATAGGTACCCTGAACAAGGTAAACACGTTTGGTT      | pLF1092              |
| LF644  | GTCAGGTTGGGAGGGACGCCATGTC                | pLF1093              |
| LF645  | AATAGGTACCAACCTCTCGAGATACGTTGAACATC      | pLF1093              |
| LF774  | GAGTACGCCCGCTTTTAGGTCAAAA                | pLF1382              |
| LF775  | AATAGGTACCCGTCGATAAGAAAGAAAGTGCAAGC      | pLF1382              |
| LF718  | CAACCGGTTGCATTGTTCTGTA                   | pLF1228              |
| LF570  | AATAGGTACCCGTCAGTACCTAAAAGTGTAAACCATA    | pLF1228              |
| LF725  | AAACATTTTTATCAGTTCTACCTTTAAGAT           | pLF1222              |
| LF702  | AATAGGTACCCCTTCTACGTGGTAAACAATTTGCA      | pLF1222              |
| LF679  | TTCCTACTGTTACTGCTCGCTAGAT                | pLF1103              |
| LF680  | AATAGGTACCCTTAGAAATCAGTACGTCGCCATAC      | pLF1103              |
| LF717  | TGAGTGCTGATGGAGCCTGT                     | pLF1231              |
| LF722  | AATAGGTACCGCGAAGAAATCTTTCAACTAAATGC      | pLF1231              |
| LF567  | TCCAGTTGGAAAACACAATAAAAAAT               | pLF767               |
| LF397  | AATAGGTACCGTTTCTAACGGATAGGTTACTAAGT      | pLF767               |
| LF640  | AAAATGAGTTTTTCATTAATGAAAGG               | pLF1090              |
| LF641  | AATAGGTACCTGATGCGACACCTGCAGAAACAGAA      | pLF1090              |
| LF1020 | AATAGGATCCATGTCTAAAGGTGAAGAATT           | pLF1727              |
| LF1021 | AATAGGATCCTGAATACTTAAAACGAACGTGAGTG      | pLF1727              |
| LF749  | TTGGAATTTGCACCAAATTTGTTAAT               | pLF1727              |
| LF776  | TACACCAACCAATTTTTGTTACCT                 | pLF1373              |
| LF777  | AATAGGTACCTTCTTTTTGTAAGTCATTTCGTCAGA     | pLF1373              |
| LF716  | CGTGTCTCACATATGAGAATGGAGG                | pLF1237              |
| LF724  | AATAGGTACCCGCATCCCGTTTTGGGTAAGCCCTA      | pLF1237              |
| LF549  | ATGCCCAATTAATTATGGCGCGTT                 | pLF806               |
| LF563  | AATAGGTACCACTACCTAGCTTTGTATAGTTGAAA      | pLF806               |
| LF715  | CCCCCTTTCCTTATTGTTTGTGTTT                | pLF1235              |
| LF723  | AATAGGTACCAAGGGTCACGAAGCCAAGAACGTTTTTCAT | pLF1235              |
| LF564  | ATAACGTATTATATAAATTCATCAA                | pLF1285              |
| LF565  | AATAGGTACCAAGTAAAGCGAGTACTACTGTTTTT      | pLF1285/1730         |
| LF720  | GCCACTAAATTGCAATGTAGTTAGC                | pLF1225              |
| LF727  | AATAGGTACCAAATGATAGGAAGAGTATTTTTAAC      | pLF1225              |
| LF556  | TAAATTCATCAAGTTCCGTCTATTATTAATAAC        | pLF840               |
| LF557  | GTTATTAATAATAGACGGAACCTTGATGAATTTA       | pLF840               |
| LF558  | ATATAACCGAGATTTTCAGCAGATCG               | pLF1730              |
| LF583  | ATAAGGCCTATCGATTTTGTGGCAGTAATGCCA        | vibhar_00417 5' RACE |
| LF584  | ATAAGGCCTACAAACGCAAGGTAGAAATACGGTT       | vibhar_00417 5' RACE |
| LF589  | ATAAGGCCTATCTATCGATAACTGACGCTCTACT       | vibhar_02446 5' RACE |
| LF590  | ATAAGGCCTCTTTCTTAAGTTCTTCTCGAGGAA        | vibhar_02446 5' RACE |
| LF591  | ATAAGGCCTCATCTTTTCTATGTTGAGTCCGCCA       | vibhar_02446 5' RACE |
| LF594  | ATAAGGCCTAATCGATTGAGCAAAGCCTTTTGCG       | vibhar_02509 5' RACE |
| LF595  | ATAAGGCCTCCGTTGCGATCTCAATCGCTTGG         | vibhar_02509 5' RACE |
| YS679  | ATAAGGCCTAGCCGCAAGTACCGCAGAAT            | vibhar_04936 5' RACE |
| YS680  | GCTGGGTTTGTGCGCAAGGGGT                   | vibhar_04936 5' RACE |



|          |                                                    |                             |
|----------|----------------------------------------------------|-----------------------------|
| LF624    | ATAAGGCCTACTGGAACACCATACCAACACCACG                 | <i>vibhar_05213</i> 5' RACE |
| LF625    | ATAAGGCCTCCTGAAGTAATGTCTTCAAGACCGGC                | <i>vibhar_05213</i> 5' RACE |
| LF418    | CAAGCTGCTTGCCTTGTAT                                | <i>vibhar_05691</i> 5' RACE |
| LF419    | ATAAGGCCTTGATCGCATTAGCGCTTGTGT                     | <i>vibhar_05691</i> 5' RACE |
| LF420    | ATAAGGCCTGGCTTAGTCGGATGAAGCAAGACT                  | <i>vibhar_05691</i> 5' RACE |
| YS675    | ATAAGGCCTGCACGAGCTTTCGTTTCATGTAACAC                | <i>vibhar_05763</i> 5' RACE |
| YS676    | ACGGATGATACGCTGTGCTTCGT                            | <i>vibhar_05763</i> 5' RACE |
| LF424    | CGATCTTGCCGAAACAAGGGCAAT                           | <i>vibhar_06930</i> 5' RACE |
| LF425    | ATAAGGCCTCCATTAACTCGGCGGGCTTTTCA                   | <i>vibhar_06930</i> 5' RACE |
| LF426    | ATAAGGCCTCCTTACTTGGACGTGCTGAGGAA                   | <i>vibhar_06930</i> 5' RACE |
| YS740    | ACCCTTATTAAGCCGAGGGTC                              | Qrr northern blot riboprobe |
| YS789    | GTTTTTTTAATACGACTCACTATAGGGAGGCGCCAATCACAATAAAGTTG | Qrr northern blot riboprobe |
| KPO-0243 | TTCGTTTCACTTCTGAGTTCGG                             | 5S rRNA northern blot probe |
| STR0381  | ATCCATCAACTCTAGGTGATAAACG                          | <i>aphA</i> qRT-PCR         |
| STR0382  | CGTCGCGAGTGCTAAGTACA                               | <i>aphA</i> qRT-PCR         |
| STR0383  | ACATCAACTCAAATGGCAAGG                              | <i>luxR</i> qRT-PCR         |
| STR0384  | GCAAACACTTCAAGAGCGATT                              | <i>luxR</i> qRT-PCR         |
| STR0038  | CCTTATTAAGCCGAGGGTCAC                              | Qrr4 qRT-PCR                |
| STR0039  | GTTGATTGGCGGTATATACTTGTG                           | Qrr4 qRT-PCR                |
| LF22     | CCATTCCGAACCTCAGAAGTGAA                            | 5S rRNA qRT-PCR             |
| LF23     | TACTCTCACATGGGGAAGCC                               | 5S rRNA qRT-PCR             |
| LF_RT13  | CGACCGATTGAAAACGCTA                                | <i>vibhar_00417</i> qRT-PCR |
| LF_RT14  | ACGGTTGGCTATAACCTGCT                               | <i>vibhar_00417</i> qRT-PCR |
| YS603    | TGATGATGAAGGCGACTGGA                               | <i>vibhar_00505</i> qRT-PCR |
| YS604    | GTTTCAATTTGGCCCCAACCT                              | <i>vibhar_00505</i> qRT-PCR |
| LF_RT47  | CGGTACACTTGACGGTCTTG                               | <i>vibhar_00986</i> qRT-PCR |
| LF_RT48  | GAAAGCAATCACACCACCGA                               | <i>vibhar_00986</i> qRT-PCR |
| LF_RT19  | AGTCCAAAGTATCGCTGAACA                              | <i>vibhar_02446</i> qRT-PCR |
| LF_RT20  | TACGTTGAACATCAGCCCCT                               | <i>vibhar_02446</i> qRT-PCR |
| LF770    | TCATGGGCGAAGGCTATCAT                               | <i>vibhar_02474</i> qRT-PCR |
| LF771    | GCATTGAGACGTTACGAGGG                               | <i>vibhar_02474</i> qRT-PCR |
| LF487    | CATGAAGTCAGCCACGGTTT                               | <i>vibhar_02509</i> qRT-PCR |
| LF488    | ACGTATTGGCTAAGTGCAGC                               | <i>vibhar_02509</i> qRT-PCR |
| LF495    | AAACTGGCGCTTGATACAGG                               | <i>vibhar_03626</i> qRT-PCR |
| LF496    | ACATTCTGCACCACTCGTTG                               | <i>vibhar_03626</i> qRT-PCR |
| LF_RT55  | TTGCTCTGAATGCCGCAAAT                               | <i>vibhar_04936</i> qRT-PCR |
| LF_RT56  | TGGCGCTCTTCTGATAGGTT                               | <i>vibhar_04936</i> qRT-PCR |
| LF497    | TTTTGCTTCAACAGGCGCTA                               | <i>vibhar_05020</i> qRT-PCR |
| LF498    | TGTCTATCTACGCATCGGCT                               | <i>vibhar_05020</i> qRT-PCR |
| LF_RT9   | TGTTGAACACGCAGCAGAAA                               | <i>vibhar_05213</i> qRT-PCR |
| LF_RT10  | TAGCGTACGACCGATAGCAA                               | <i>vibhar_05213</i> qRT-PCR |
| LF_RT59  | TGGCGGCTAAATTCCAAGTG                               | <i>vibhar_05384</i> qRT-PCR |
| LF_RT60  | AGCCTAACTCACTACGAGCC                               | <i>vibhar_05384</i> qRT-PCR |
| LF331    | TACTTCTGGGACTGACGCC                                | <i>vibhar_05691</i> qRT-PCR |
| LF332    | CATTTACGCCAGTGGAAT                                 | <i>vibhar_05691</i> qRT-PCR |
| YS611    | ACGAAGCACAGCGTATCATC                               | <i>vibhar_05763</i> qRT-PCR |
| YS612    | TAGCAGCTGGCTCACTTCTT                               | <i>vibhar_05763</i> qRT-PCR |
| LF_RT51  | ATTCCGTAGTTCGCGTTTCC                               | <i>vibhar_06097</i> qRT-PCR |
| LF_RT52  | CTCTGCTGACATACCCCACA                               | <i>vibhar_06097</i> qRT-PCR |
| YS631    | GACTAAGTCGGCACTTGAGC                               | <i>vibhar_06299</i> qRT-PCR |
| YS632    | ACACCCGGAGCATATCTGAG                               | <i>vibhar_06299</i> qRT-PCR |
| LF772    | CAAAACTGGCGACTGTCCAA                               | <i>vibhar_06448</i> qRT-PCR |
| LF773    | TGCTTGCCAGATTCCCCTTA                               | <i>vibhar_06448</i> qRT-PCR |
| LF_RT27  | GACAGTGAAAAGTCTGGCCC                               | <i>vibhar_06455</i> qRT-PCR |
| LF_RT28  | TGACTTGCGCTTGAAACTT                                | <i>vibhar_06455</i> qRT-PCR |
| LF465    | CGAGGTTAAACAAGCCTGGTC                              | <i>vibhar_06665</i> qRT-PCR |
| LF466    | TTACGCCAATCCGCATCTTC                               | <i>vibhar_06665</i> qRT-PCR |
| LF1053   | CTGCAAGCTATGGTTCTTAT                               | <i>vibhar_06741</i> qRT-PCR |

|         |                            |                              |
|---------|----------------------------|------------------------------|
| LF1054  | CCTGAGATTTGATCTGAGTC       | <i>vibhar_06741</i> qRT-PCR  |
| LF_RT43 | ACCCTTCTTGCTGCTTCTCT       | <i>vibhar_06888</i> qRT-PCR  |
| LF_RT44 | ACCAACACAATGGGATGCTG       | <i>vibhar_06888</i> qRT-PCR  |
| LF342   | GAGTCGATGCCTCAAACCAC       | <i>vibhar_06930</i> qRT-PCR  |
| LF343   | AGGAACTTCACCGAGTGTGT       | <i>vibhar_06930</i> qRT-PCR  |
| LF_RT1  | CGTGAAGTCAGTCGTTTGGT       | <i>vibhar_p08223</i> qRT-PCR |
| LF_RT2  | GCATGTTCTGGATTTTGCCT       | <i>vibhar_p08223</i> qRT-PCR |
| LF1059  | TGTTCAATTAACCTCAGATGGTGACT | <i>luxC</i> qRT-PCR          |
| LF1060  | TTCTTCTTGAATACTCTTCGCTCTT  | <i>luxC</i> qRT-PCR          |

### Supplemental References:

Bassler BL, Greenberg EP, Stevens a M. 1997. Cross-species induction of luminescence in the quorum-sensing bacterium *Vibrio harveyi*. *Journal of bacteriology* **179**: 4043–5.

Dunn AK, Millikan DS, Adin DM, Jeffrey L, Stabb E V, Bose JL. 2006. New rfp- and pES213-Derived Tools for Analyzing Symbiotic *Vibrio fischeri* Reveal Patterns of Infection and lux Expression In Situ. *Applied and environmental microbiology* **72**: 802–10.

Levine E, Zhang Z, Kuhlman T, Hwa T. 2007. Quantitative characteristics of gene regulation by small RNA. *PLoS biology* **5**: e229.

Long T, Tu KC, Wang Y, Mehta P, Ong NP, Bassler BL, Wingreen NS. 2009. Quantifying the integration of quorum-sensing signals with single-cell resolution. *PLoS biology* **7**: e68.

De Lorenzo V, Timmis KN. 1994. Analysis and construction of stable phenotypes in gram-negative bacteria with Tn5- and Tn10-derived minitransposons. *Methods in Enzymology* **235**: 386–405.

Massé E, Escorcía FE, Gottesman S. 2003. Coupled degradation of a small regulatory RNA and its mRNA targets in *Escherichia coli*. *Genes & development* **17**: 2374–83.

**Figure S1**

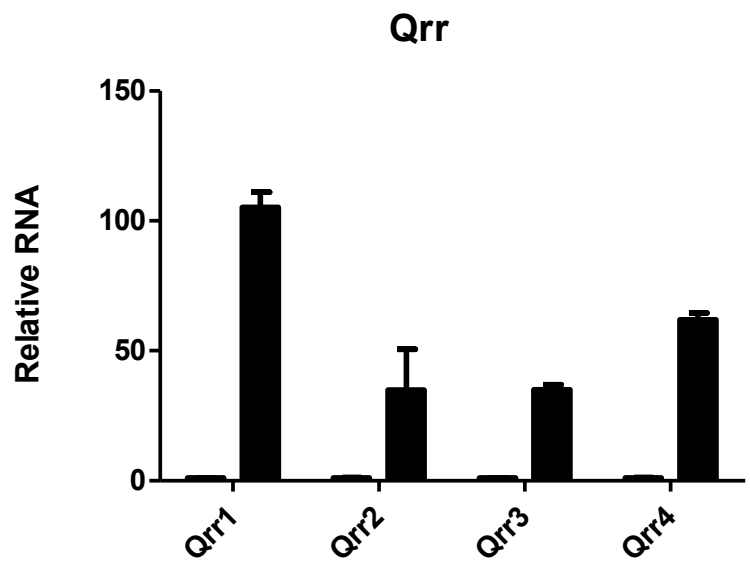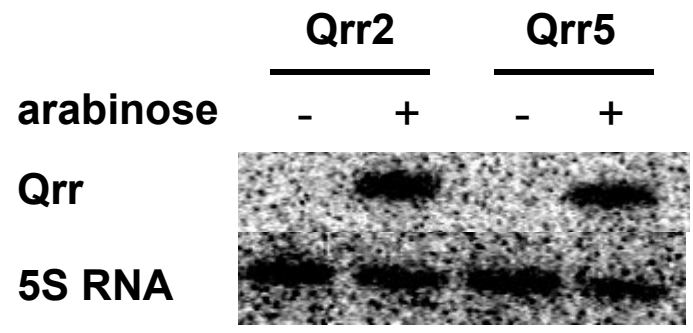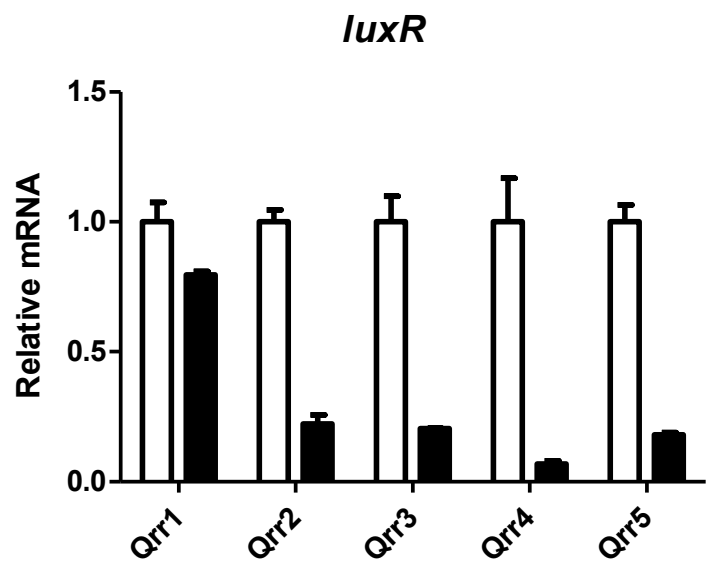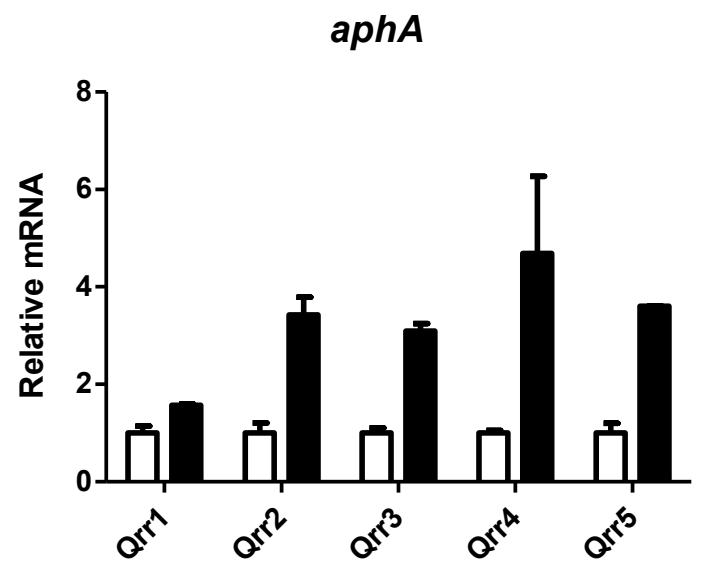

**Figure S2**

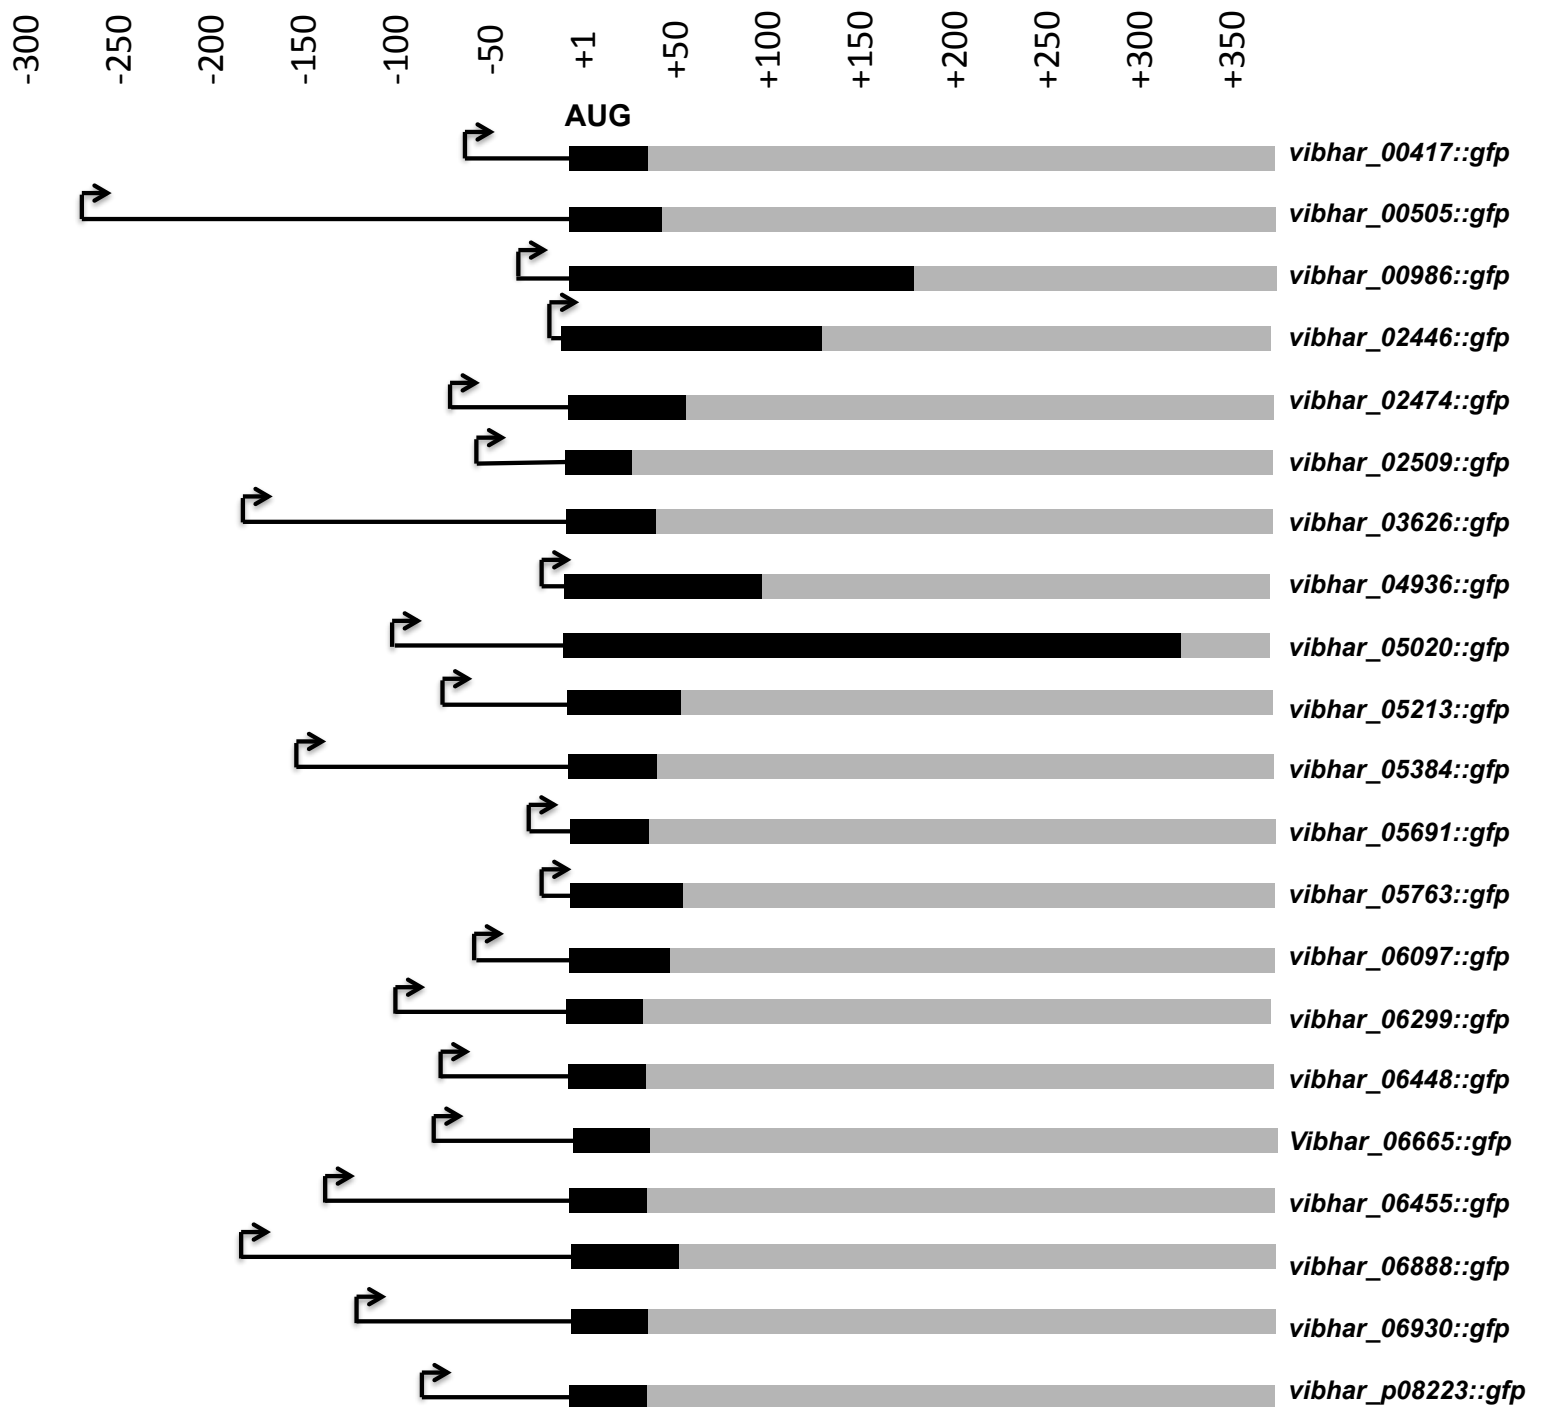

# Figure S3

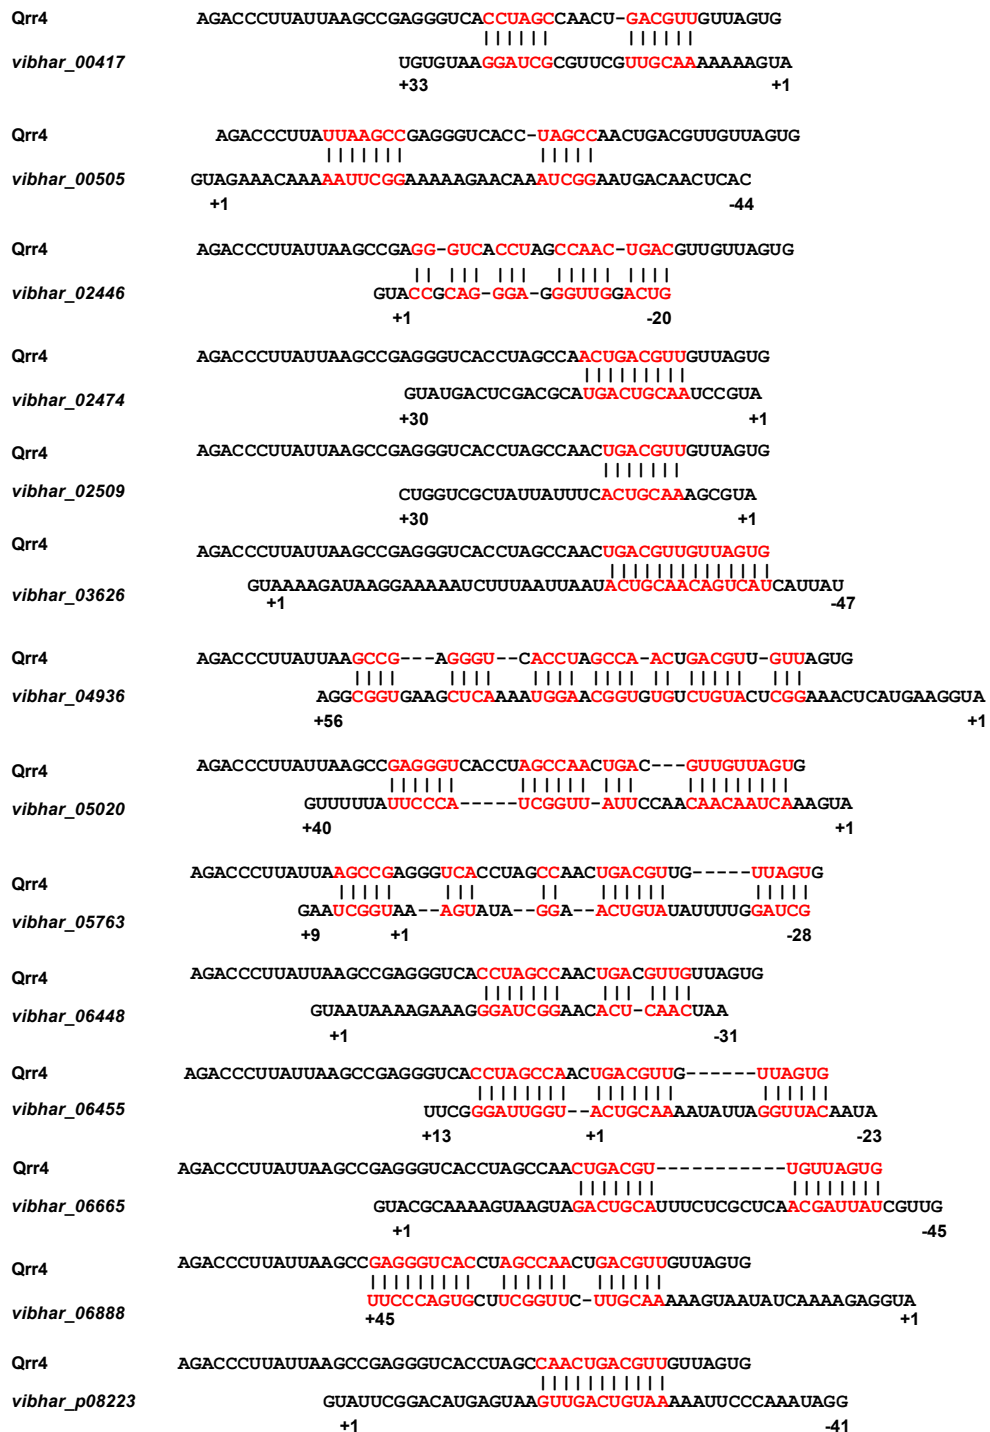

# Figure S4

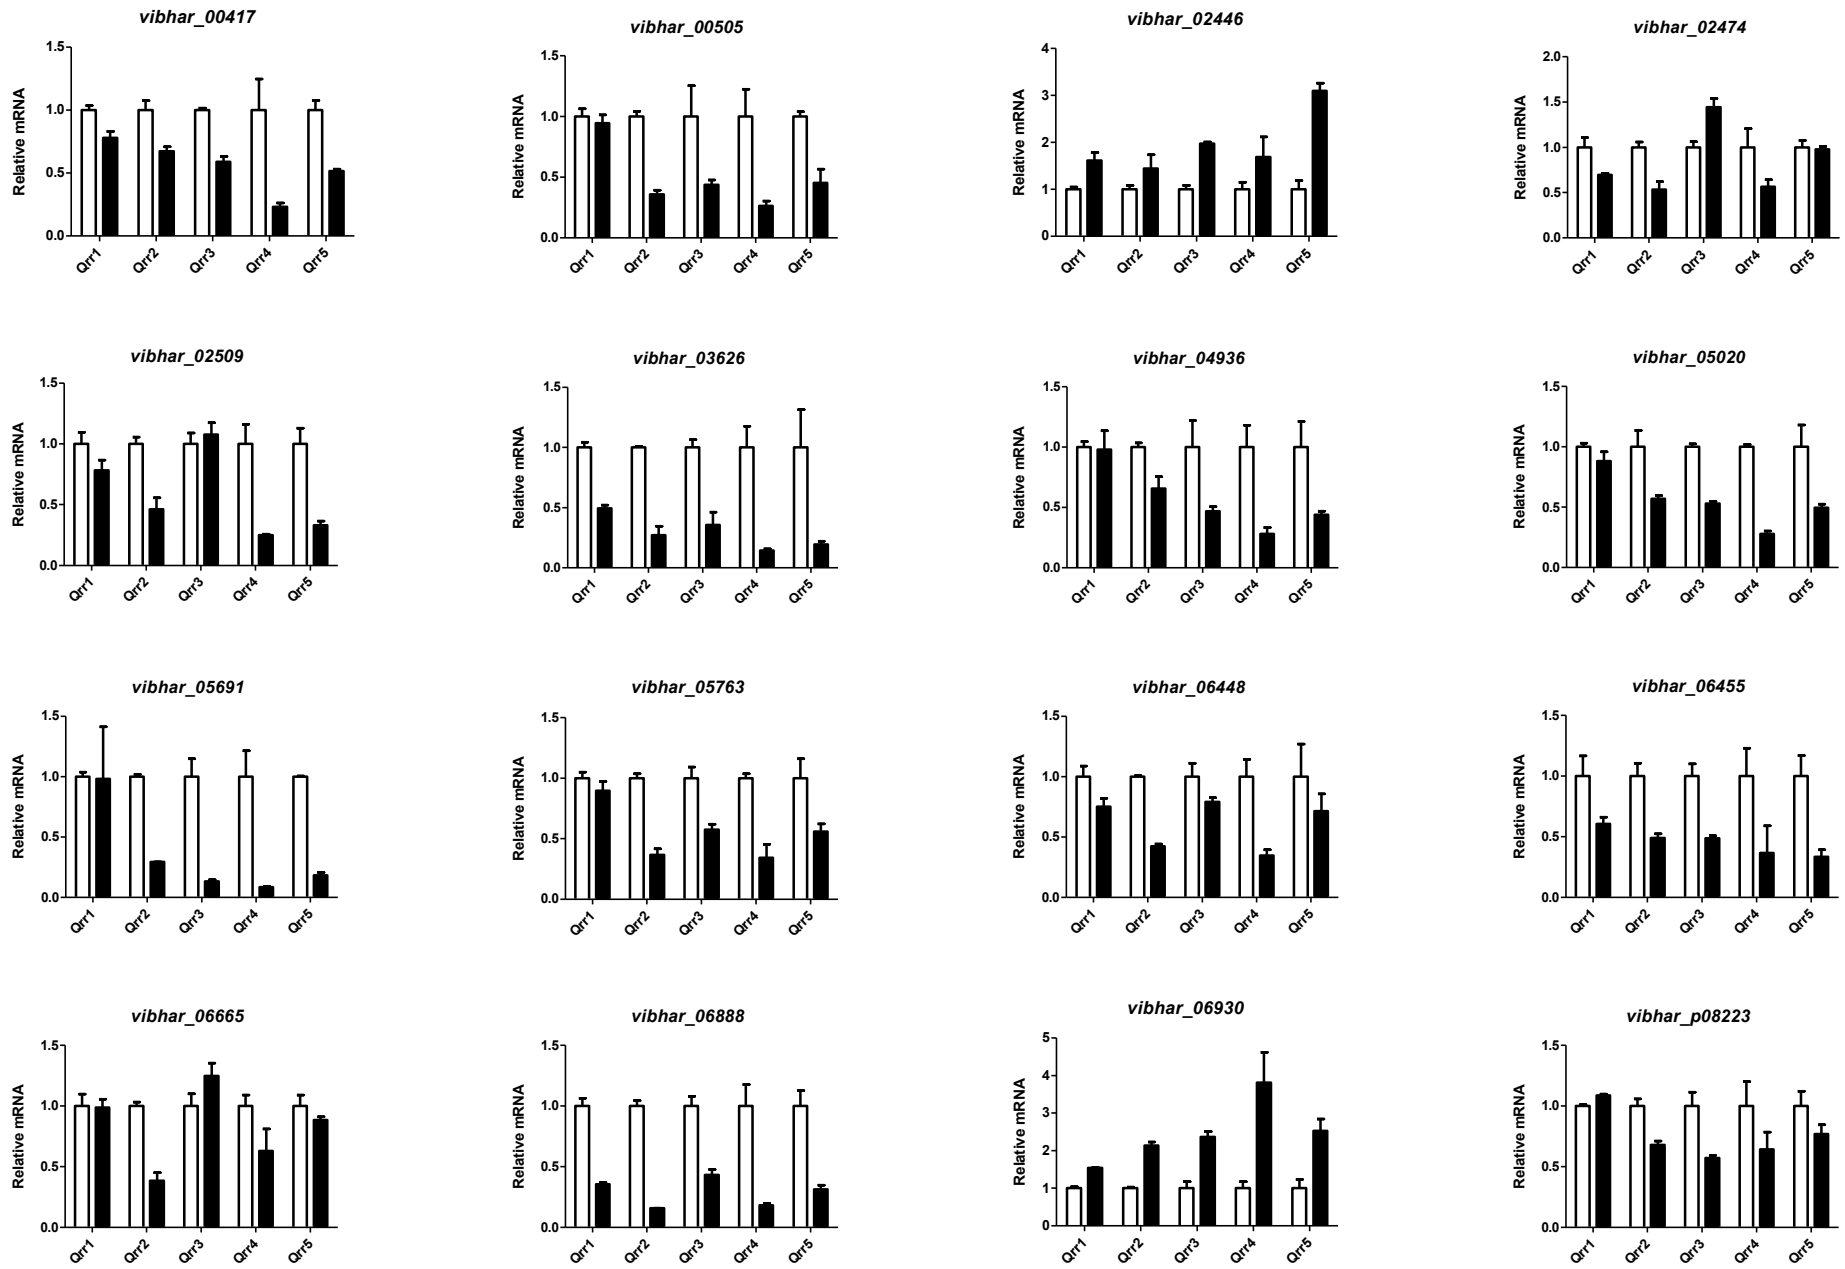

Figure S5

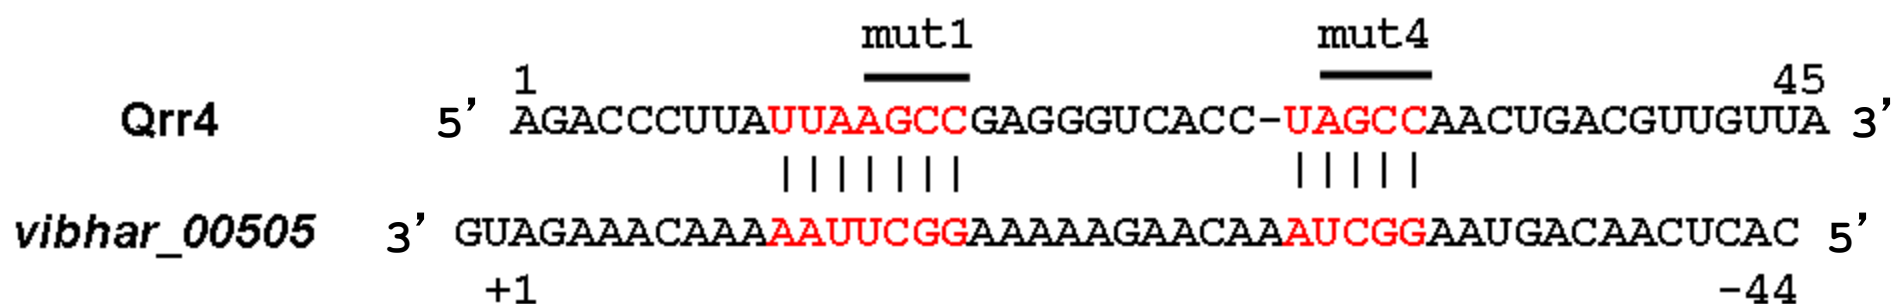

VIBHAR\_00505-GFP

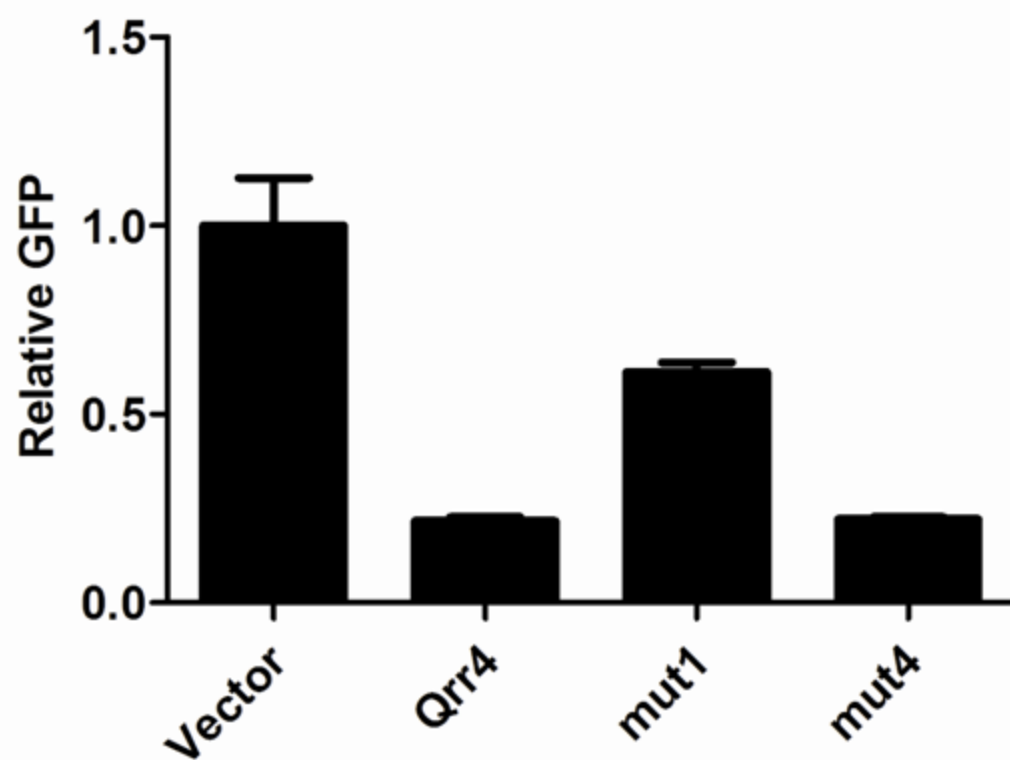

# Figure S6

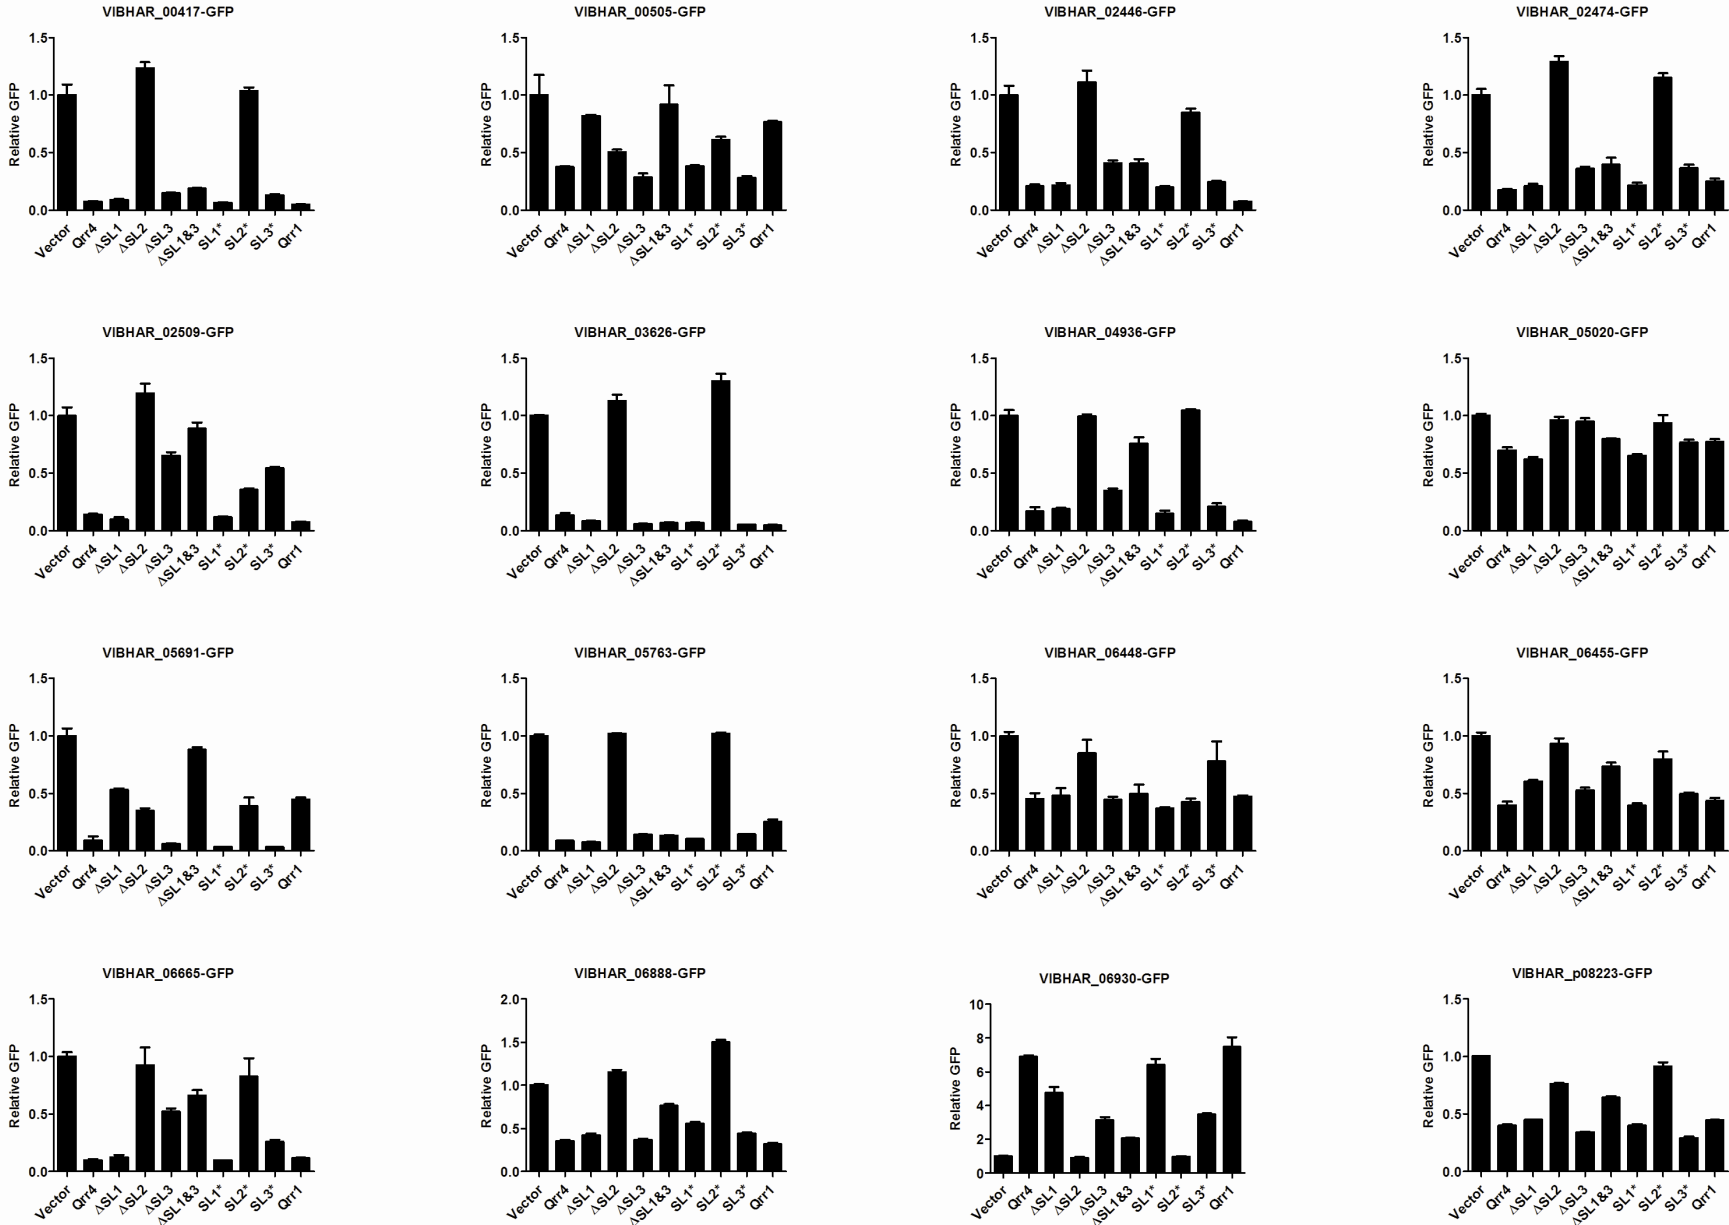



Figure S7

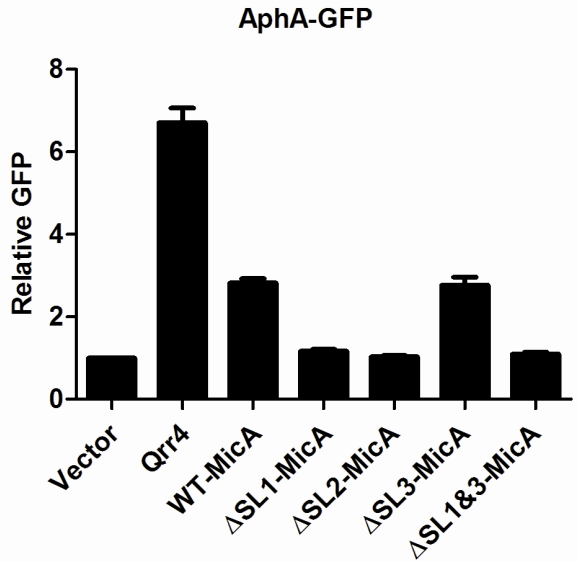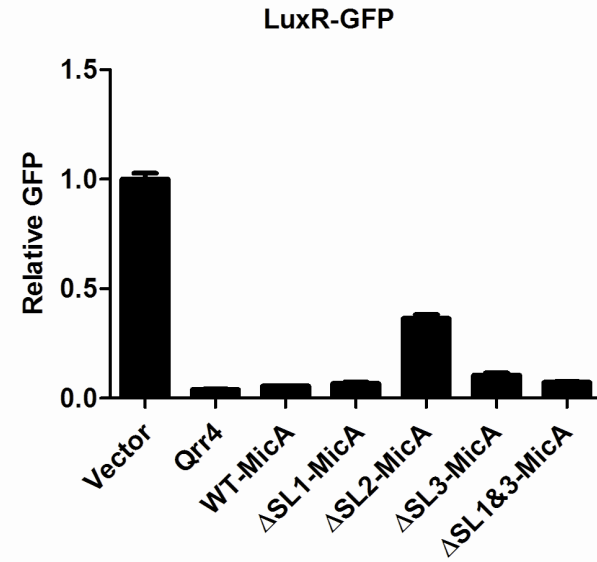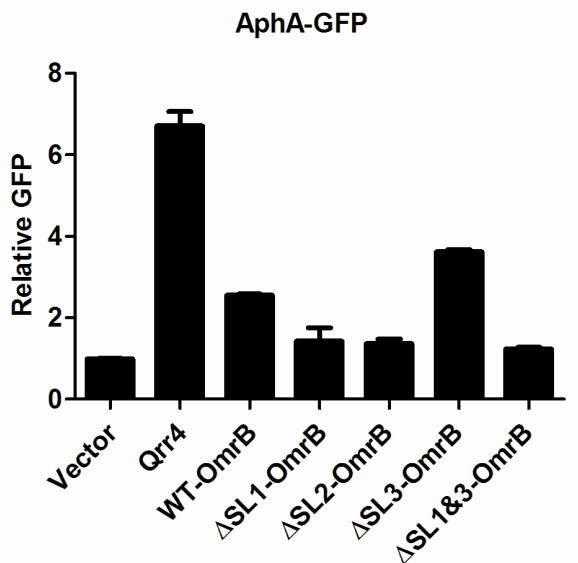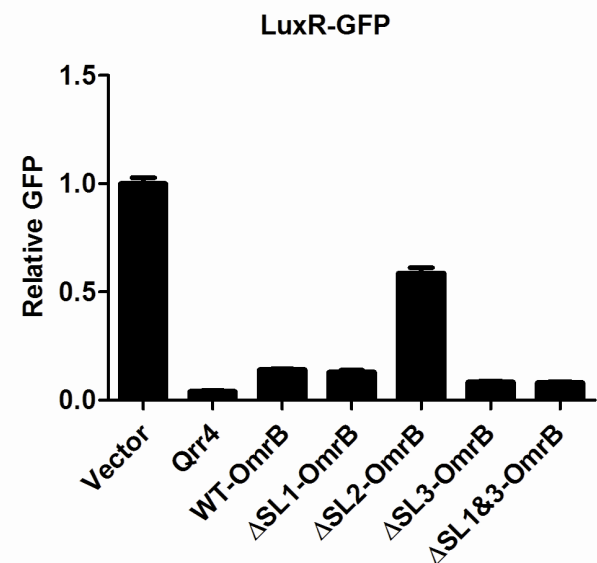

**Figure S8**

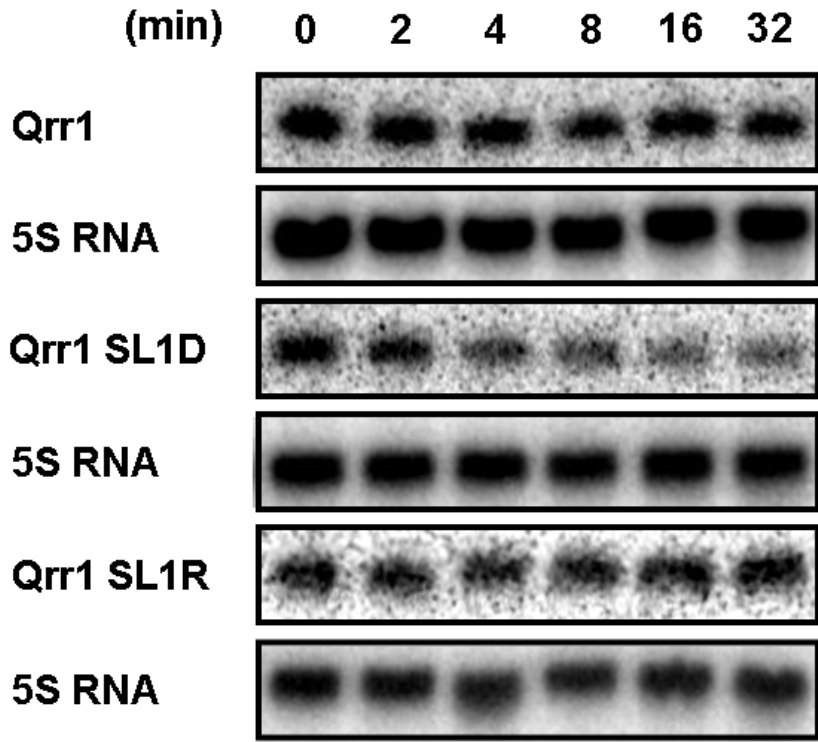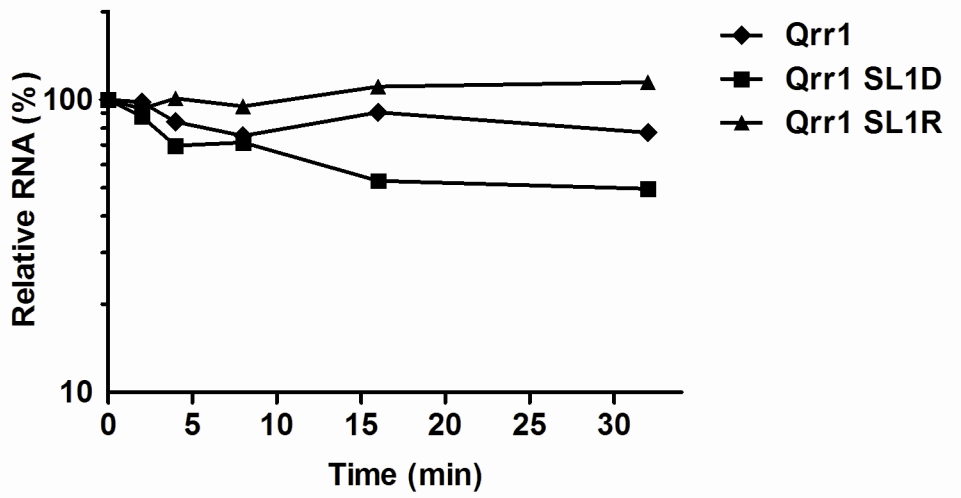

**Figure S9**

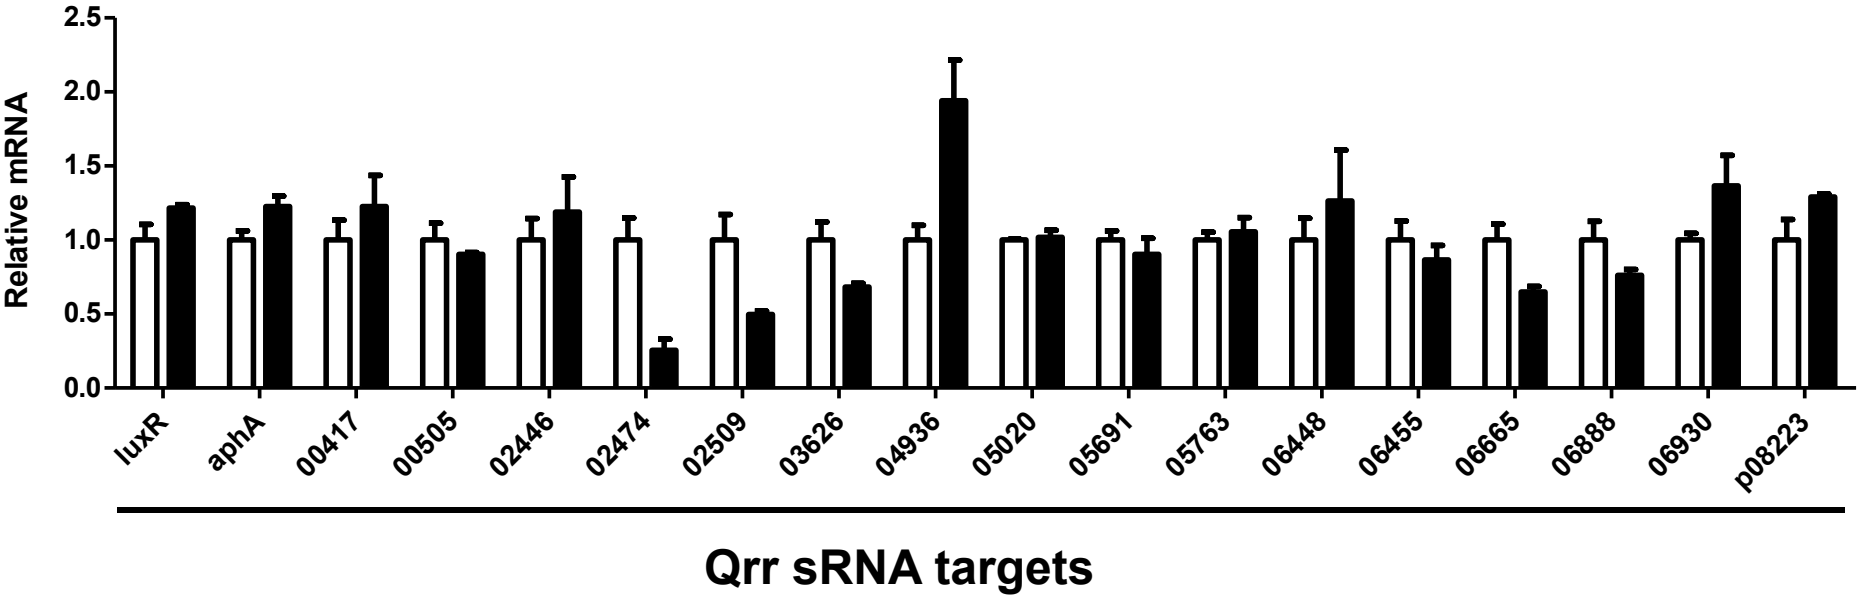

Supplement: emboj2013155s1.pdf [file emboj2013155s1.pdf]
